# Supplementary material for: Combined oxidation and in situ coagulation in an iron-activated sulfite process for tribromophenol removal in an actual water matrix
Source: Royal Society of Chemistry journal article supplement (doi:10.1039/d4ew00368c), 2024-01-01
Supplement: d4ew00368c1.pdf [file d4ew00368c1.pdf]

## Supplementing Information

### Combined oxidation and *in-situ* coagulation in iron-activated sulfite process for tribromophenol removal in actual water matrix

Zongping Wang,<sup>a</sup> Guodong Wan,<sup>b</sup> Lisan Cao,<sup>a</sup> Yujie Cheng,<sup>a</sup> Zhenbin Chen<sup>a</sup> and Pengchao Xie,<sup>\*a</sup>

<sup>a</sup> *School of Environmental Science and Engineering, Hubei Provincial Engineering Research Center for Water Quality Safety and Pollution Control, Hubei Key Laboratory of Multi-media Pollution Cooperative Control in Yangtze Basin, Huazhong University of Science and Technology, Wuhan, 430074, China*

<sup>b</sup> *School of Traffic and Transportation, Lanzhou Jiaotong University, Lanzhou 730070, China*

-----  
\* Corresponding author. E-mail: [pengchao\\_xie@hust.edu.cn](mailto:pengchao_xie@hust.edu.cn) (P. Xie)

**Captions:**

**Text S1** Tribromophenol detection method .....4

**Tab. S1** Water quality parameters .....5

**Tab. S2** XPS peak area ratios of different elements .....6

**Fig. S1** Batch addition of S(IV) experimental procedure schematic .....7

**Fig. S2** Effects of the addition times of S(IV) on the removal of fluorescent organic matter in lake water (a) and secondary sedimentation tank effluent (b). Conditions: [TBP]<sub>0</sub> = 10 μM, [Fe(III)]<sub>0</sub> = 100 μM, [S(IV)]<sub>Total</sub> = 400 μM, initial pH 4.0, temperature 25 ± 1 °C.....8

**Fig. S3** Effects of S(IV) addition times on fluorescent organic matter removal in lake water (a-c) and secondary sedimentation tank effluent (d-f). Conditions: [TBP]<sub>0</sub> = 10 μM, [Fe(III)]<sub>0</sub> = 100 μM, [S(IV)]<sub>Total</sub> = 400 μM, initial pH 4.0, temperature 25 ± 1 °C.....9

**Fig. S4** XPS spectra of O 1s in flocs after treatment by Fe(III) coagulation alone and combined pre-oxidation and coagulation process of Fe(III)/S(IV) in lake water (a-b) and secondary sedimentation tank effluent (c-d). Conditions: [TBP]<sub>0</sub> = 10 μM, [Fe(III)]<sub>0</sub> = 100 μM, [S(IV)]<sub>Total</sub> = 400 μM, initial pH 4.0, the S(IV) addition times was 2, temperature 25 ± 1 °C. .... 11

**Fig. S5** FTIR spectra of flocs derived from Fe(III) coagulation alone and combined pre-oxidation and coagulation of Fe(III)/S(IV) in lake water (a) and secondary sedimentation tank effluent (b). Conditions: [TBP]<sub>0</sub> = 10 μM, [Fe(III)]<sub>0</sub> = 100 μM, [S(IV)]<sub>Total</sub> = 400 μM, initial pH 4.0, the S(IV) addition times was 2, temperature 25 ± 1 °C..... 10

**Fig. S6** Effects of initial Fe(III) dosage on the removal of fluorescent organic matter in lake water (a) and secondary sedimentation tank effluent (b). Conditions: [TBP]<sub>0</sub> = 10 μM, [S(IV)]<sub>Total</sub> = 400 μM, initial pH 4.0, the S(IV) addition times was 2, temperature 25 ± 1 °C..... 12

**Fig. S7** Effects of Fe(III) concentration on zeta potential values in lake water (a) and secondary sedimentation tank effluent (b). Conditions: [TBP]<sub>0</sub> = 10 μM, [S(IV)]<sub>Total</sub> = 400 μM, initial pH 4.0, the S(IV) addition times was 2, temperature 25 ± 1 °C.

..... 13

**Fig. S8** Effects of initial S(IV) dosage on the removal of fluorescent organic matter in lake water (a) and secondary sedimentation tank effluent (b). Conditions:  $[TBP]_0 = 10 \mu\text{M}$ ,  $[\text{Fe(III)}]_0 = 100 \mu\text{M}$ , initial pH 4.0, the S(IV) addition times was 2, temperature  $25 \pm 1 \text{ }^\circ\text{C}$ ..... 14

**Fig. S9** Effects of initial pH on the removal of turbidity, DOC, TBP,  $UV_{254}$  and fluorescent organic matter in lake water (a-b), and secondary sedimentation tank effluent (c-d). Conditions:  $[TBP]_0 = 10 \mu\text{M}$ ,  $[\text{Fe(III)}]_0 = 100 \mu\text{M}$ ,  $[\text{S(IV)}]_{\text{Total}} = 400 \mu\text{M}$ , initial pH 4.0, the S(IV) addition times was 2, temperature  $25 \pm 1 \text{ }^\circ\text{C}$ ..... 15

### **Test S1 Tribromophenol detection method**

The tribromophenol was achieved using liquid chromatography (LC) with an Agilent HC-C18 column (5  $\mu\text{m}$ , 250 mm  $\times$  4.6 mm) operated at a column temperature of 25  $^{\circ}\text{C}$ , with a detection wavelength set at 290 nm and an injection volume of 50  $\mu\text{L}$ . The mobile phase, comprising methanol, ultrapure water, and glacial acetic acid in a volume ratio of 85:15:1, respectively, facilitated precise separation and detection of tribromophenol compounds.

**Tab. S1** Water quality parameters

| <b>parameter</b>  | <b>unit</b>      | <b>lake water</b> | <b>secondary sedimentation tank effluent</b> |
|-------------------|------------------|-------------------|----------------------------------------------|
| turbidity         | NTU              | 19.8              | 2.22                                         |
| pH                | —                | 8.02              | 7.53                                         |
| UV <sub>254</sub> | cm <sup>-1</sup> | 0.078             | 0.089                                        |
| DOC               | mg/L             | 9.45              | 7.95                                         |

**Tab. S2** XPS peak area ratios of different elements

| Type     | Characteristic peaks | Lake water (eV)                         |         | Ratio/%                                 |         | Secondary sedimentation tank effluent (eV) |         | Ratio/%                                 |         |
|----------|----------------------|-----------------------------------------|---------|-----------------------------------------|---------|--------------------------------------------|---------|-----------------------------------------|---------|
|          |                      | Fe(III)/Na <sub>2</sub> SO <sub>3</sub> | Fe(III) | Fe(III)/Na <sub>2</sub> SO <sub>3</sub> | Fe(III) | Fe(III)/Na <sub>2</sub> SO <sub>3</sub>    | Fe(III) | Fe(III)/Na <sub>2</sub> SO <sub>3</sub> | Fe(III) |
| Fe<br>2p | Fe(II)               | 710.6                                   | 710.6   | 29.32                                   | 21.90   | 710.7                                      | 710.6   | 27.12                                   | 19.50   |
|          |                      | 724.0                                   | 724.0   | 12.85                                   | 9.52    | 724.1                                      | 723.9   | 11.86                                   | 8.50    |
|          | Fe(III)              | 712.0                                   | 712.0   | 40.16                                   | 47.62   | 712.1                                      | 712.0   | 42.37                                   | 50.00   |
|          |                      | 725.7                                   | 725.7   | 17.67                                   | 20.95   | 725.6                                      | 725.6   | 18.64                                   | 22.00   |
| O 1s     | Fe–O                 | 530.0                                   | 530.0   | 12.16                                   | 9.42    | 530.2                                      | 530.0   | 21.62                                   | 12.14   |
|          | Fe–OH                | 531.2                                   | 531.2   | 39.22                                   | 18.83   | 531.1                                      | 530.9   | 30.03                                   | 21.84   |
|          | C=O                  | 532.0                                   | 532.0   | 27.84                                   | 44.84   | 531.9                                      | 531.9   | 21.02                                   | 48.54   |
|          | C–O                  | 532.9                                   | 532.9   | 20.78                                   | 26.91   | 533.0                                      | 533.2   | 27.33                                   | 17.48   |

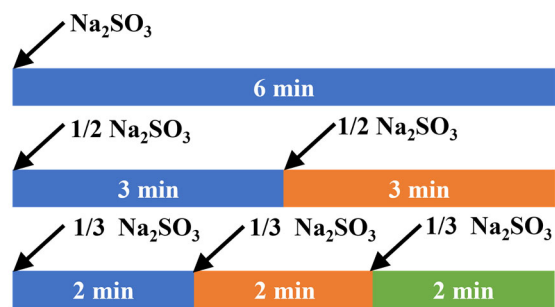

**Fig. S1** Batch addition of S(IV) experimental procedure schematic

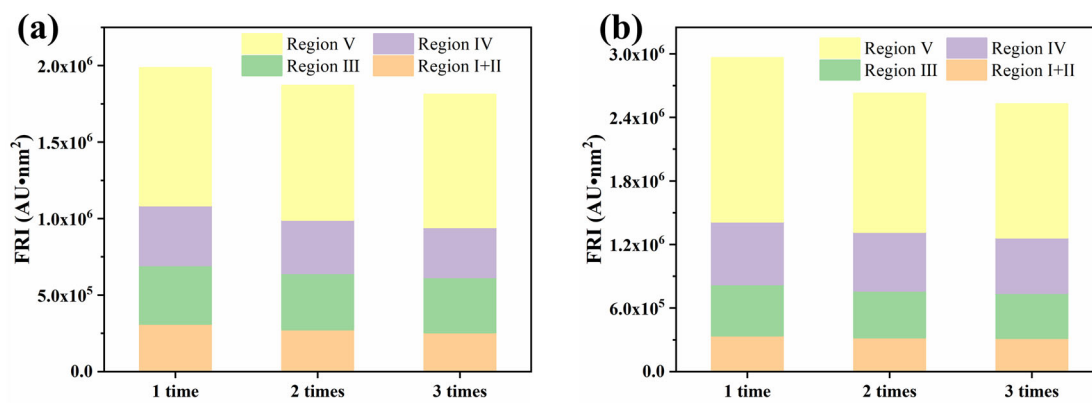

**Fig. S2** Effects of the addition times of S(IV) on the removal of fluorescent organic matter in lake water (a) and secondary sedimentation tank effluent (b). Conditions:  $[\text{TBP}]_0 = 10 \mu\text{M}$ ,  $[\text{Fe(III)}]_0 = 100 \mu\text{M}$ ,  $[\text{S(IV)}]_{\text{Total}} = 400 \mu\text{M}$ , initial pH 4.0, temperature  $25 \pm 1 \text{ }^\circ\text{C}$ .



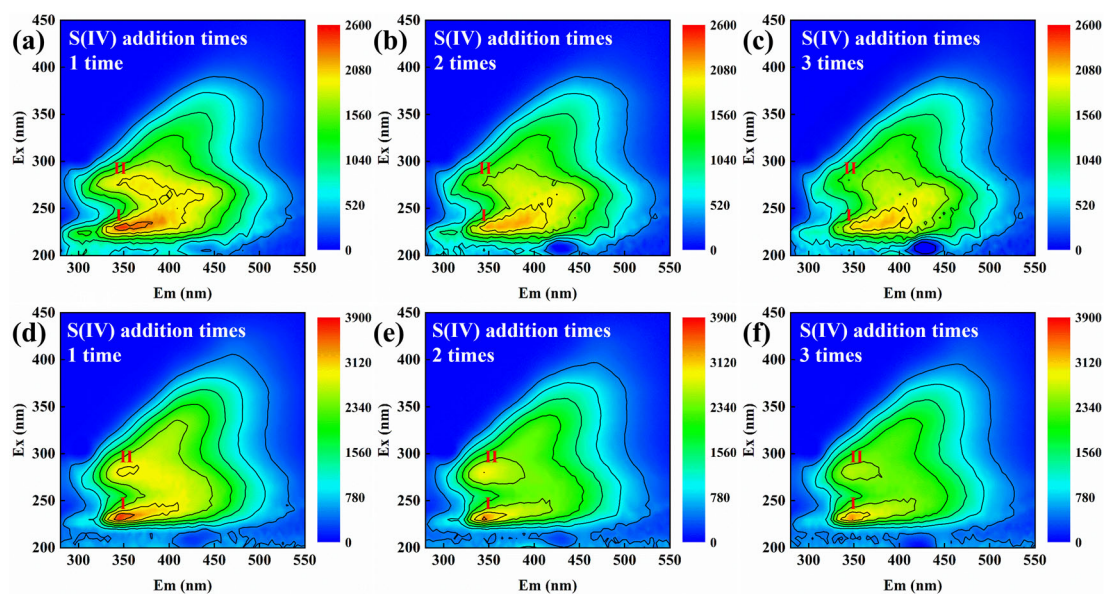

**Fig. S3** Effects of S(IV) addition times on fluorescent organic matter removal in lake water (a-c) and secondary sedimentation tank effluent (d-f). Conditions:  $[\text{TBP}]_0 = 10 \mu\text{M}$ ,  $[\text{Fe(III)}]_0 = 100 \mu\text{M}$ ,  $[\text{S(IV)}]_{\text{Total}} = 400 \mu\text{M}$ , initial pH 4.0, temperature  $25 \pm 1 \text{ }^\circ\text{C}$ .

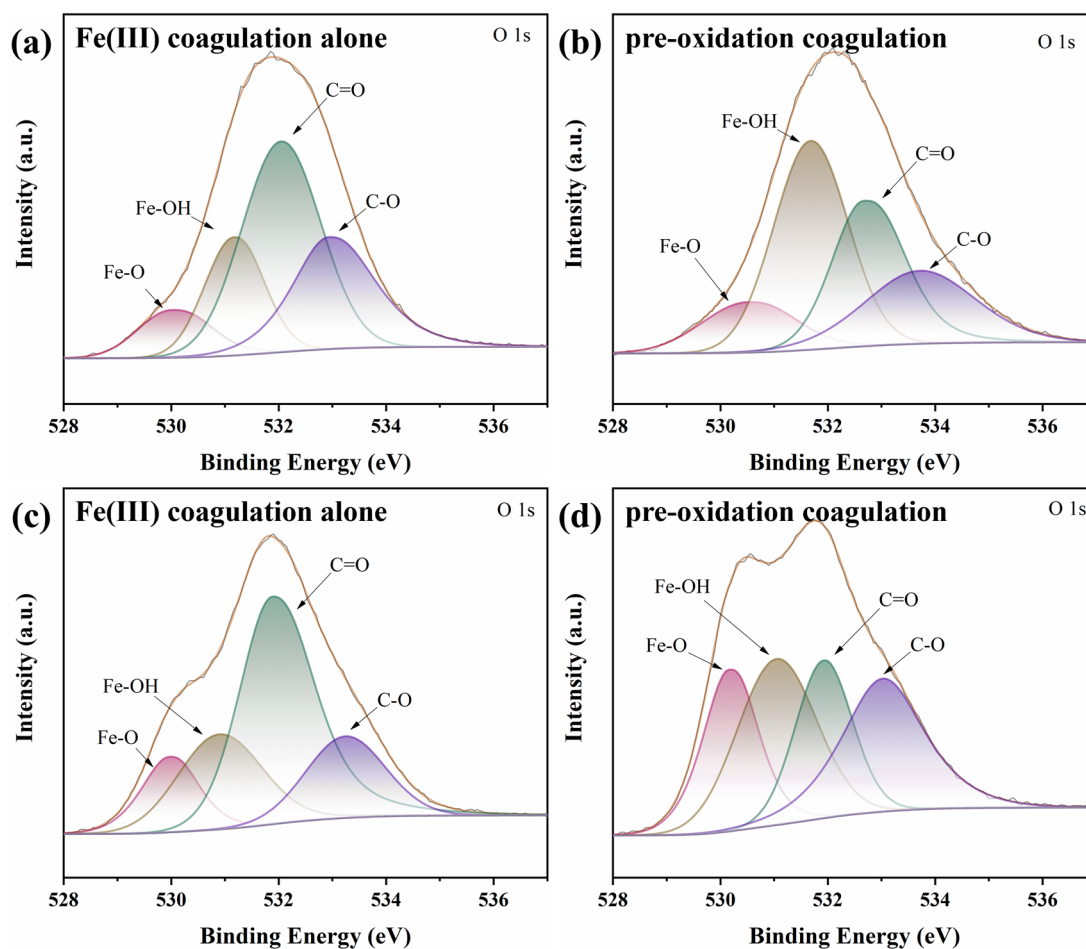

**Fig. S4** XPS spectra of O 1s in flocs after treatment by Fe(III) coagulation alone and combined pre-oxidation and coagulation process of Fe(III)/S(IV) in lake water (a-b) and secondary sedimentation tank effluent (c-d). Conditions:  $[\text{TBP}]_0 = 10 \mu\text{M}$ ,  $[\text{Fe(III)}]_0 = 100 \mu\text{M}$ ,  $[\text{S(IV)}]_{\text{Total}} = 400 \mu\text{M}$ , initial pH 4.0, the S(IV) addition times was 2, temperature  $25 \pm 1 \text{ }^\circ\text{C}$ .

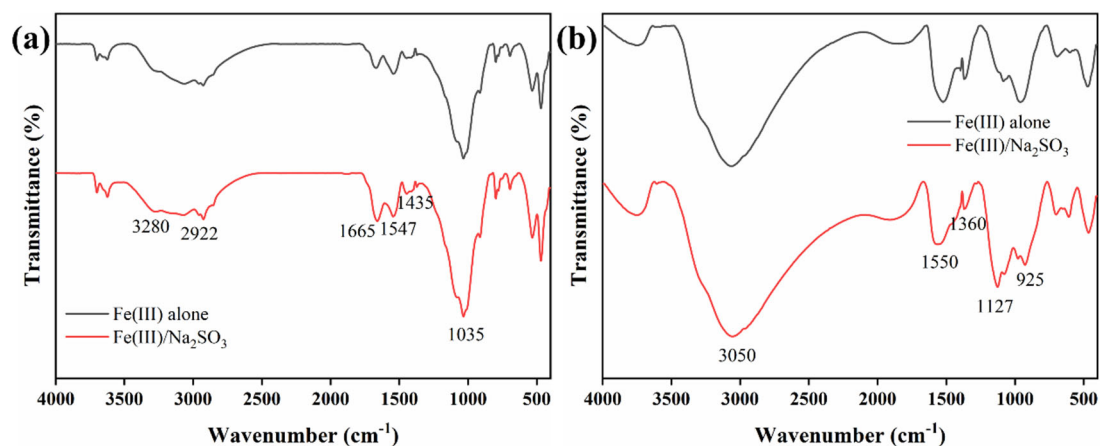

**Fig. S5** FTIR spectra of flocs derived from Fe(III) coagulation alone and combined pre-oxidation and coagulation of Fe(III)/S(IV) in lake water (a) and secondary sedimentation tank effluent (b). Conditions:  $[TBP]_0 = 10 \mu\text{M}$ ,  $[\text{Fe(III)}]_0 = 100 \mu\text{M}$ ,  $[\text{S(IV)}]_{\text{Total}} = 400 \mu\text{M}$ , initial pH 4.0, the S(IV) addition times was 2, temperature  $25 \pm 1 \text{ }^\circ\text{C}$ .

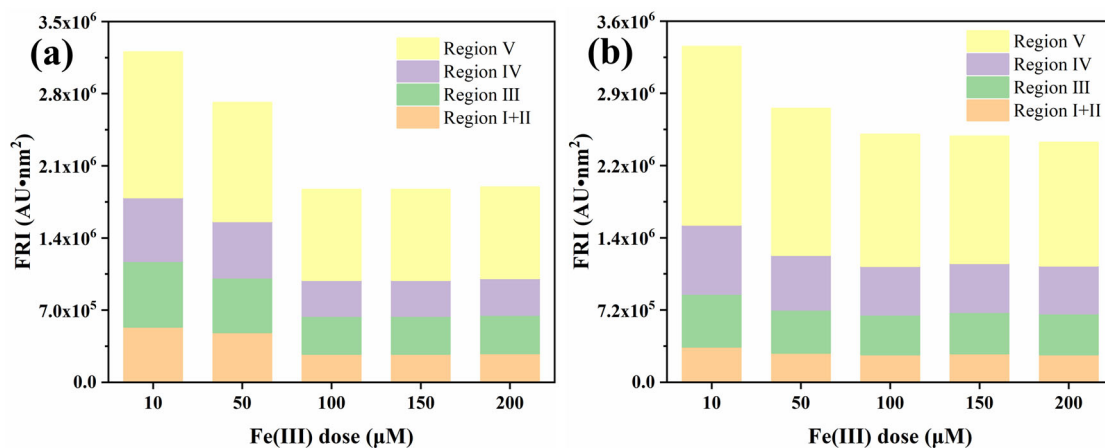

**Fig. S6** Effects of initial Fe(III) dosage on the removal of fluorescent organic matter in lake water (a) and secondary sedimentation tank effluent (b). Conditions:  $[TBP]_0 = 10 \mu\text{M}$ ,  $[S(\text{IV})]_{\text{Total}} = 400 \mu\text{M}$ , initial pH 4.0, the S(IV) addition times was 2, temperature  $25 \pm 1 \text{ }^\circ\text{C}$ .

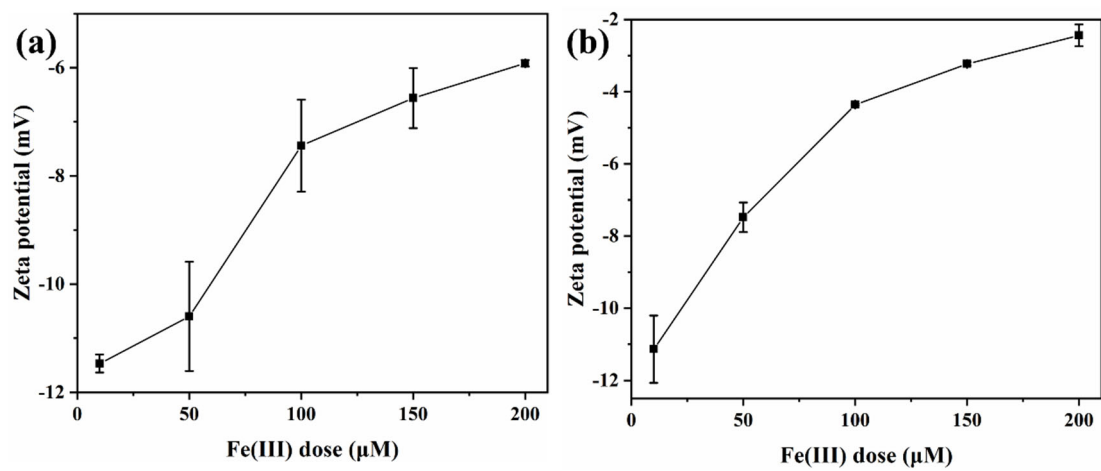

**Fig. S7** Effects of Fe(III) concentration on zeta potential values in lake water (a) and secondary sedimentation tank effluent (b). Conditions:  $[TBP]_0 = 10 \mu\text{M}$ ,  $[S(IV)]_{\text{Total}} = 400 \mu\text{M}$ , initial pH 4.0, the S(IV) addition times was 2, temperature  $25 \pm 1 \text{ }^\circ\text{C}$ .

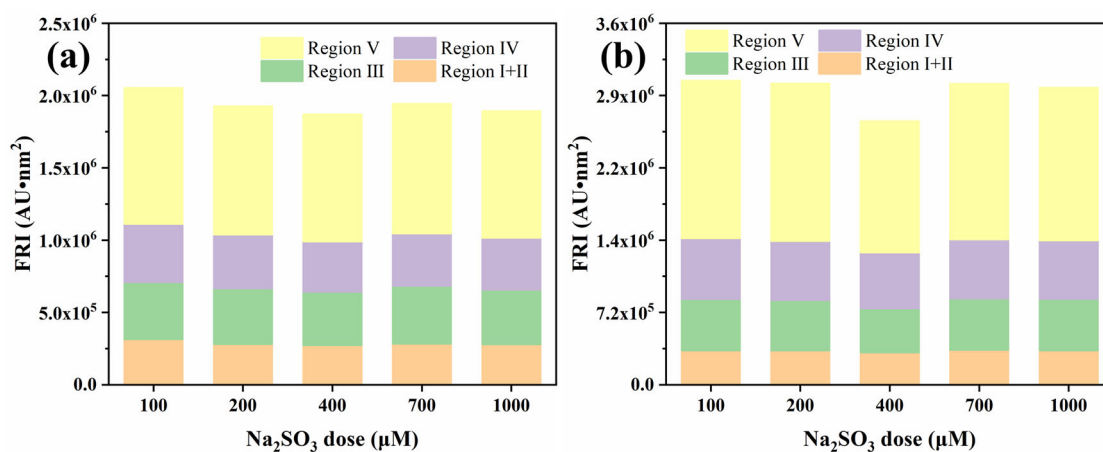

**Fig. S8** Effects of initial S(IV) dosage on the removal of fluorescent organic matter in lake water (a) and secondary sedimentation tank effluent (b). Conditions: [TBP]<sub>0</sub> = 10 μM, [Fe(III)]<sub>0</sub> = 100 μM, initial pH 4.0, the S(IV) addition times was 2, temperature 25 ± 1 °C.

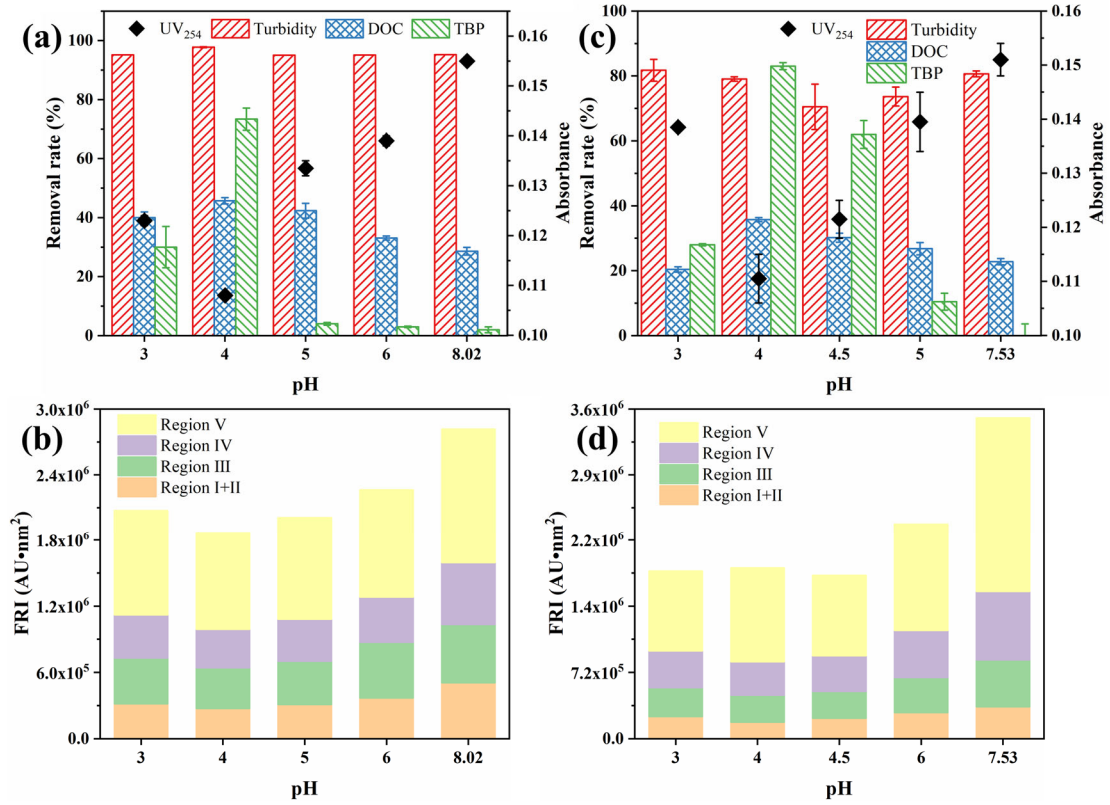

**Fig. S9** Effects of initial pH on the removal of turbidity, DOC, TBP, UV<sub>254</sub> and fluorescent organic matter in lake water (a-b) and secondary sedimentation tank effluent (c-d). Conditions: [TBP]<sub>0</sub> = 10 μM, [Fe(III)]<sub>0</sub> = 100 μM, [S(IV)]<sub>Total</sub> = 400 μM, initial pH 4.0, the S(IV) addition times was 2, temperature 25 ± 1 °C.
